# Supplementary material
Source: PubMed Central journal article supplement (PMC139266)
Supplement: pnas_99_26_17043__3.pdf [file pnas_99_26_17043__3.pdf]

Table 2. Summary of the initial whole genome PCR scanning data of the eight O157 chromosomes

| Segments*           | Total<br>( <i>n</i> = 4,392) | Loop<br>unrelated<br>( <i>n</i> = 2,712) | Loop related ( <i>n</i> = 1,680) |                                   |                             |
|---------------------|------------------------------|------------------------------------------|----------------------------------|-----------------------------------|-----------------------------|
|                     |                              |                                          | Sp-related<br>( <i>n</i> = 536)  | SpLE-related<br>( <i>n</i> = 168) | Others<br>( <i>n</i> = 976) |
| Conserved           | 4,006 (91%)                  | 2,651 (98%)                              | 296 (55%)                        | 138 (82%)                         | 921 (94%)                   |
| Size-difference [Y] | 144 (3%)                     | 33 (1%)                                  | 53 (10%)                         | 15 (9%)                           | 43 (4%)                     |
| Not amplified [R]   | 242 (6%)                     | 28 (1%)                                  | 187 (35%)                        | 15 (9%)                           | 12 (1%)                     |

\*Conserved, [Y], [R] segments correspond to gray, yellow, and red rectangles in Fig.2, respectively.
