# Supplementary material
Source: PubMed Central journal article supplement (PMC139266)
Supplement: pnas_99_26_17043__4.pdf [file pnas_99_26_17043__4.pdf]

Table 3. The list of S-loops that are conserved in all eight tested O157 strains

| S-loop     | Position | Length, bp | ORFs encoded           | Note                                                                     |
|------------|----------|------------|------------------------|--------------------------------------------------------------------------|
| S-loop 1   | 18463    | 24969      | 6,505 ECs0019-ECs0025  | Fimbrial biosynthesis locus 1                                            |
| S-loop 3   | 54725    | 55371      | 645 ECs0052-ECs0053    |                                                                          |
| S-loop 10  | 154205   | 161615     | 7,409 ECs0139-ECs0145  | Fimbrial biosynthesis locus 2                                            |
| S-loop 18  | 345356   | 347807     | 2,450 ECs0328-ECs0330  |                                                                          |
| S-loop 19  | 348664   | 353381     | 4,716 ECs0331-ECs0335  |                                                                          |
| S-loop 20  | 354806   | 358558     | 3,751 ECs0336          |                                                                          |
| S-loop 21  | 359426   | 360014     | 587 ECs0338            |                                                                          |
| S-loop 24  | 379200   | 383870     | 4,669 ECs0361-ECs0362  | AidA-I adhesin-like protein, etc.                                        |
| S-loop 26  | 394158   | 394757     | 598                    |                                                                          |
| S-loop 27  | 394828   | 399422     | 4,593 ECs0374-ECs0378  | Putative sugar transporter                                               |
| S-loop 28  | 411185   | 411749     | 563                    |                                                                          |
| S-loop 30  | 424356   | 426191     | 1,834 ECs0399-ECs0400  |                                                                          |
| S-loop 31  | 438071   | 446196     | 8,124 ECs0413-ECs0418  | Putative ferric transporter                                              |
| S-loop 33  | 451337   | 452983     | 1,645 ECs0424          |                                                                          |
| S-loop 35  | 468382   | 470322     | 1,939                  |                                                                          |
| S-loop 37  | 486313   | 487971     | 1,657 ECs0454          |                                                                          |
| S-loop 38  | 494106   | 494794     | 687 ECs0461-Ecs0462    |                                                                          |
| S-loop 39  | 501355   | 503339     | 1,983 ECs0472          |                                                                          |
| S-loop 43  | 605563   | 608223     | 2,659 ECs0546-ECs0550  | Adhesin/invasin-like protein, etc.                                       |
| S-loop 44  | 664488   | 676004     | 11,515 ECs0602-ECs0607 | RhsK/J                                                                   |
| S-loop 48  | 690300   | 690804     | 503 ECs0620-ECs0621    |                                                                          |
| S-loop 49  | 812814   | 814242     | 1,427                  |                                                                          |
| S-loop 51  | 824488   | 829848     | 5,359 ECs0741-ECs0744  | Fimbrial biosynthesis locus 4                                            |
| S-loop 52  | 841618   | 855497     | 13,878 ECs0755-ECs0767 |                                                                          |
| S-loop 57  | 954607   | 957415     | 2,807 ECs0876          |                                                                          |
| S-loop 59  | 1000996  | 1001993    | 996 ECs0914            |                                                                          |
| S-loop 60  | 1024922  | 1028441    | 3,518 ECs0940-ECs0942  | Putative transporter                                                     |
| S-loop 61  | 1033040  | 1035649    | 2,608 ECs0949-ECs0951  |                                                                          |
| S-loop 70  | 1321634  | 1324179    | 2,544 ECs1262          |                                                                          |
| S-loop 71  | 1337196  | 1368924    | 31,727 ECs1272-ECs1288 | Fimbrial biosynthesis locus 6 and putative fatty acid biosynthesis genes |
| S-loop 88  | 1898538  | 1899204    | 665 ECs1906            |                                                                          |
| S-loop 89  | 1899341  | 1900235    | 893 ECs1907-ECs1908    |                                                                          |
| S-loop 95  | 1983605  | 1988511    | 4,905 ECs2005-ECs2007  | Putative transporter                                                     |
| S-loop 98  | 2002853  | 2004673    | 1,819 ECs2016-ECs2019  |                                                                          |
| S-loop 101 | 2064664  | 2065318    | 653 ECs2073-ECs2074    |                                                                          |
| S-loop 102 | 2065631  | 2067177    | 1,545 ECs2075-ECs2076  | IpaH-like protein and putative outer membrane protein                    |
| S-loop 107 | 2146931  | 2148439    | 1,507 ECs2142-ECs2143  | Putative transcriptional regulator, etc.                                 |
| S-loop 115 | 2450242  | 2451084    | 841 ECs2473            | Hypothetical lipoprotein                                                 |
| S-loop 120 | 2624612  | 2625565    | 952 ECs2662            |                                                                          |
| S-loop 128 | 2735503  | 2737954    | 2,450 ECs2789-ECs2791  |                                                                          |
| S-loop 132 | 2773357  | 2787539    | 14,181 ECs2831-ECs2845 | O antigen biosynthesis                                                   |
| S-loop 133 | 2788491  | 2789868    | 1,376 ECs2847          | Putative UDP-galactose 4-epimerase                                       |
| S-loop 135 | 2814861  | 2815608    | 746 ECs2869-ECs2870    |                                                                          |
| S-loop 138 | 2858968  | 2861261    | 2,292 ECs2908-ECs2910  | Putative outer membrane protein, etc.                                    |
| S-loop 141 | 2863192  | 2864164    | 971 ECs2914-ECs2915    | A part of fimbrial biosynthesis locus 9                                  |
| S-loop 142 | 2867206  | 2867782    | 575 ECs2916-ECs2917    | A part of fimbrial biosynthesis locus 9                                  |
| S-loop 150 | 2883045  | 2883981    | 935                    |                                                                          |
| S-loop 156 | 2959357  | 2965543    | 6,185 ECs3027-ECs3032  | Putative salicylate degradation system                                   |
| S-loop 160 | 3075435  | 3077315    | 1,879 ECs3121-ECs3122  |                                                                          |
| S-loop 161 | 3077557  | 3079271    | 1,713 ECs3123          |                                                                          |
| S-loop 166 | 3175533  | 3178040    | 2,506 ECs3216-ECs3220  | A part of fimbrial biosynthesis locus 10                                 |
| S-loop 168 | 3180470  | 3181231    | 760 ECs3221            | A part of fimbrial biosynthesis locus 10                                 |
| S-loop 170 | 3182200  | 3182723    | 522 ECs3222            | A part of fimbrial biosynthesis locus 10                                 |

|            |         |         |        |                 |                                                                 |
|------------|---------|---------|--------|-----------------|-----------------------------------------------------------------|
| S-loop 173 | 3245984 | 3247733 | 1,748  | ECs3276-ECs3277 | IS609                                                           |
| S-loop 177 | 3361137 | 3366004 | 4,866  | ECs3381-ECs3384 | Putative anaerobic dimethyl sulfoxide reductase, etc.           |
| S-loop 188 | 3522675 | 3524758 | 2,082  | ECs3534-ECs3535 | Putative transcriptional regulator, etc.                        |
| S-loop 192 | 3598251 | 3607431 | 9,179  | ECs3608-ECs3616 |                                                                 |
| S-loop 194 | 3625316 | 3628911 | 3,594  | ECs3634-ECs3638 |                                                                 |
| S-loop 202 | 3811381 | 3814817 | 3,435  | ECs3799-ECs3804 | Putative ABC transporter                                        |
| S-loop 203 | 3824485 | 3825421 | 935    | ECs3813         | Hypothetical lipoprotein                                        |
| S-loop 206 | 3912297 | 3919602 | 7,304  | ECs3912-ECs3917 | Putative ferrichrome ABC transporter                            |
| S-loop 211 | 4020311 | 4022617 | 2,305  | ECs4013-ECs4014 | PTS system for <i>N</i> -acetyl-galactosamine and galactosamine |
| S-loop 215 | 4188466 | 4189183 | 716    | ECs4187-ECs4188 | Leader peptidase HopD, etc.                                     |
| S-loop 218 | 4267902 | 4268792 | 889    | ECs4261-ECs4262 |                                                                 |
| S-loop 219 | 4276740 | 4279593 | 2,852  | ECs4270-ECs4272 | Putative ABC transporter                                        |
| S-loop 220 | 4291463 | 4294975 | 3,511  | ECs4280-ECs4284 | Putative DNA helicases, etc.                                    |
| S-loop 221 | 4300881 | 4302699 | 1,817  | ECs4291-ECs4292 |                                                                 |
| S-loop 223 | 4310167 | 4311209 | 1,041  | ECs4300         |                                                                 |
| S-loop 224 | 4316855 | 4317799 | 943    | ECs4307-ECs4308 |                                                                 |
| S-loop 225 | 4332161 | 4347543 | 15,381 | ECs4324-ECs4341 | Putative fatty acid biosynthesis genes                          |
| S-loop 226 | 4353594 | 4360156 | 6,561  | ECs4349-ECs4357 | Putative PTS system, etc.                                       |
| S-loop 231 | 4388327 | 4397385 | 9,057  | ECs4379-ECs4387 | Hem transport system                                            |
| S-loop 232 | 4452481 | 4458385 | 5,903  | ECs4426-ECs4431 | Fimbrial biosynthesis locus 12                                  |
| S-loop 235 | 4488012 | 4492034 | 4,021  | ECs4457-ECs4459 | Putative transcriptional regulator, etc.                        |
| S-loop 237 | 4497957 | 4499326 | 1,368  | ECs4465         |                                                                 |
| S-loop 238 | 4517840 | 4523932 | 6,091  | ECs4479-4480    |                                                                 |
| S-loop 239 | 4543692 | 4551792 | 8,099  | ECs4500-4504    | <i>rfa</i> locus                                                |
| S-loop 243 | 4571151 | 4572007 | 855    | ECs4528         |                                                                 |
| S-loop 246 | 4628167 | 4629008 | 840    | ECs4597-ECs4598 |                                                                 |
| S-loop 247 | 4637919 | 4641277 | 3,357  | ECs4607-ECs4610 |                                                                 |
| S-loop 248 | 4651870 | 4652379 | 508    | ECs4622         |                                                                 |
| S-loop 249 | 4674425 | 4677053 | 2,627  | ECs4642-ECs4643 |                                                                 |
| S-loop 252 | 4686175 | 4693574 | 7,398  | ECs4653-ECs4659 |                                                                 |
| S-loop 253 | 4698338 | 4705282 | 6,943  | ECs4665-ECs4670 | Fimbrial biosynthesis locus 13                                  |
| S-loop 262 | 4865138 | 4866128 | 989    | ECs4801         |                                                                 |
| S-loop 264 | 4875484 | 4877532 | 2,047  | ECs4812-ECs4814 |                                                                 |
| S-loop 267 | 4918811 | 4920339 | 1,527  | ECs4854-ECs4855 |                                                                 |
| S-loop 268 | 4928764 | 4934291 | 5,526  | ECs4864-ECs4865 | RhsF                                                            |
| S-loop 269 | 4967546 | 4970248 | 2,701  | ECs4892-ECs4893 | Putative amino acid amidohydrolase and transporter              |
| S-loop 276 | 5159503 | 5168718 | 9,214  | ECs5067-ECs5074 | Putative sugar ABC transporter                                  |
| S-loop 278 | 5281714 | 5283463 | 1,748  | ECs5182-ECs5183 | IS609                                                           |
| S-loop 290 | 5423936 | 5426840 | 2,903  | ECs5295-ECs5296 |                                                                 |
| S-loop 292 | 5435059 | 5437298 | 2,238  | ECs5304-ECs5305 |                                                                 |
| S-loop 293 | 5437753 | 5445572 | 7,818  | ECs5306-ECs5310 | Type I restriction-modification system                          |
| S-loop 294 | 5449126 | 5449949 | 822    | ECs5314         |                                                                 |

---
