# Supplementary material
Source: PubMed Central journal article supplement (PMC139266)

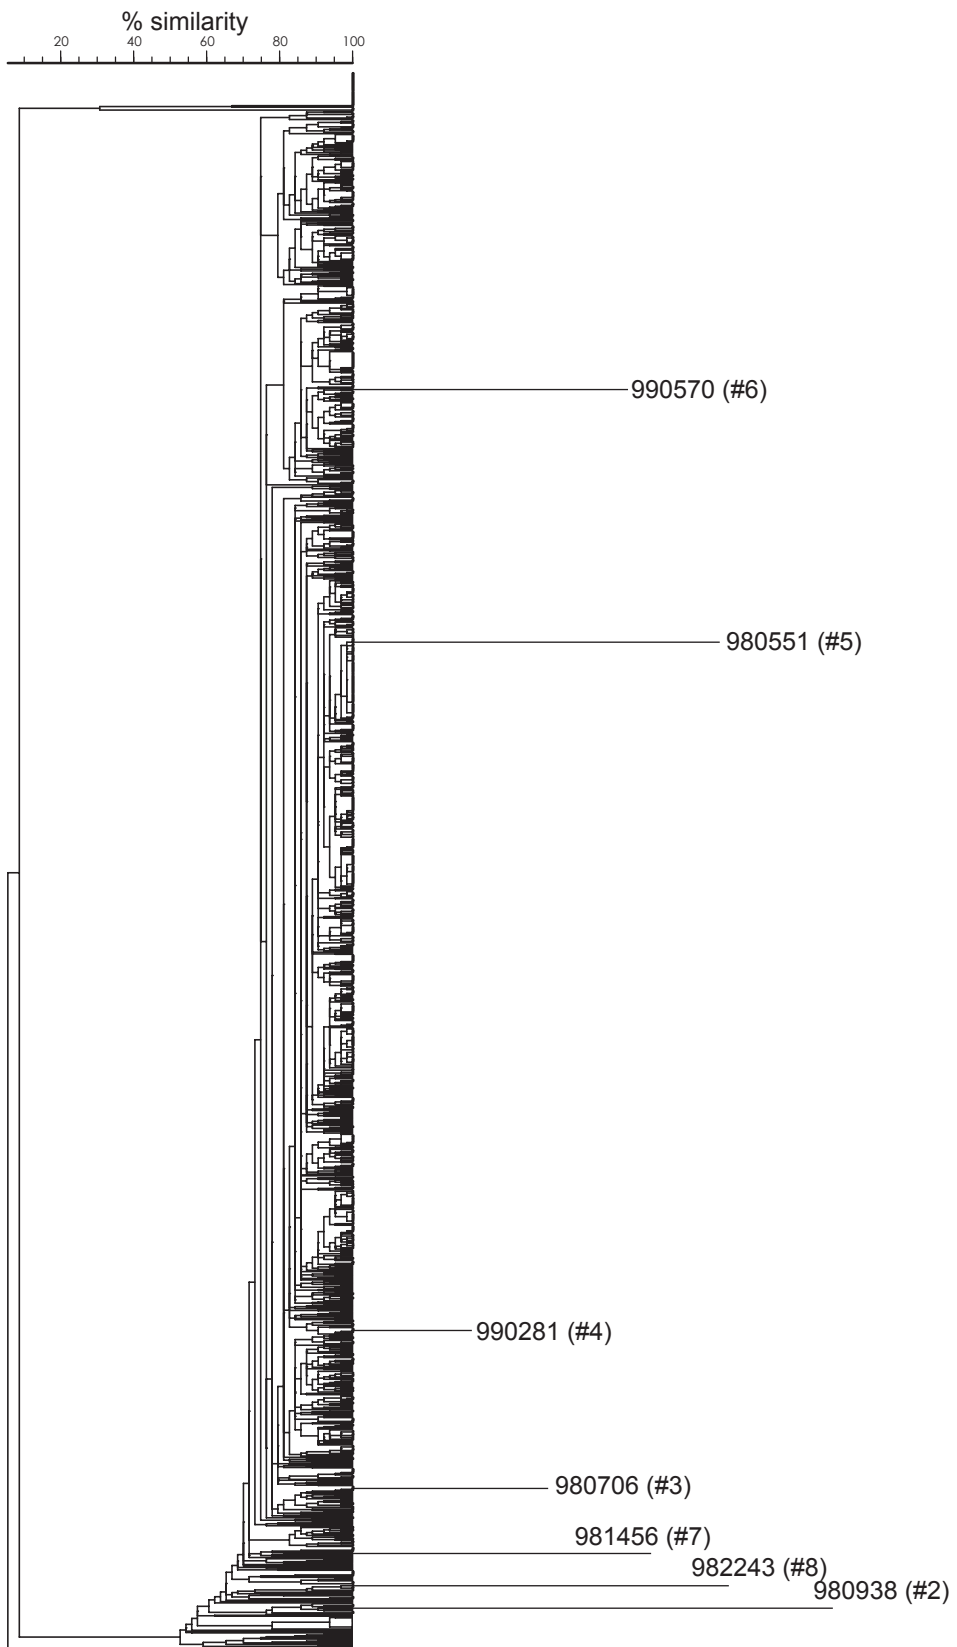

Supplement: pnas_99_26_17043__2.pdf [file pnas_99_26_17043__2.pdf]

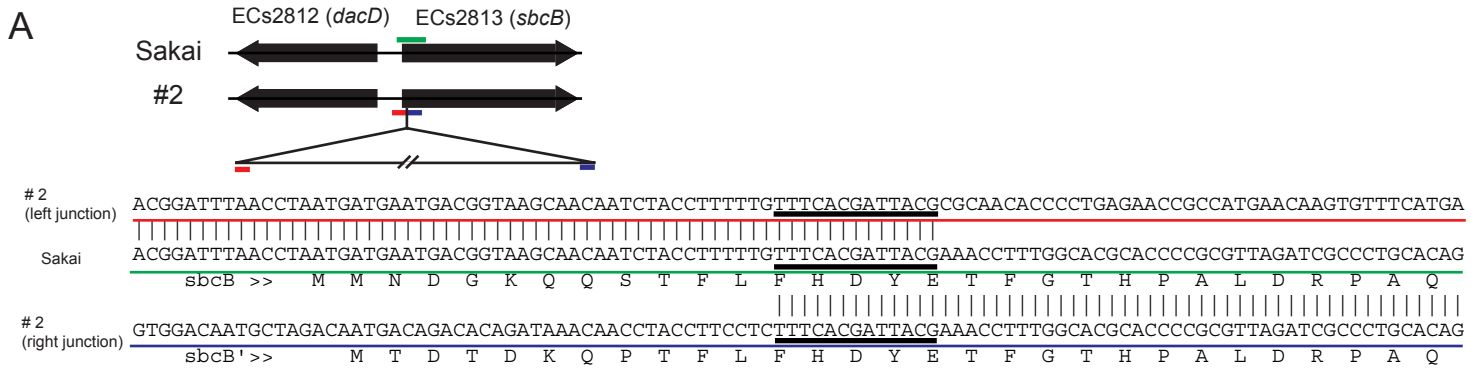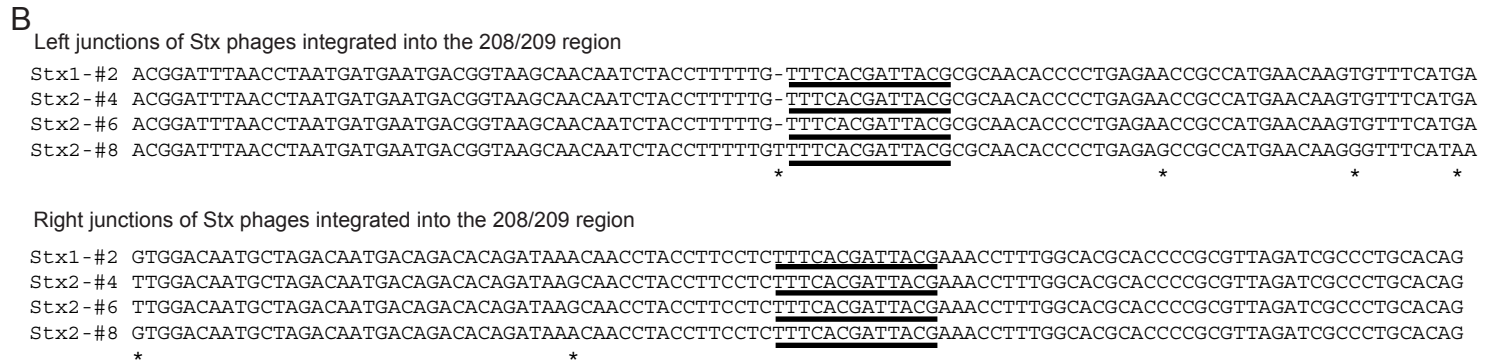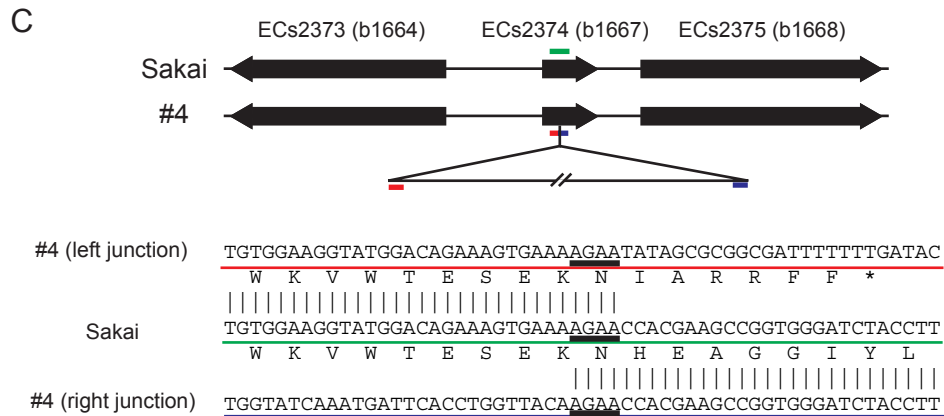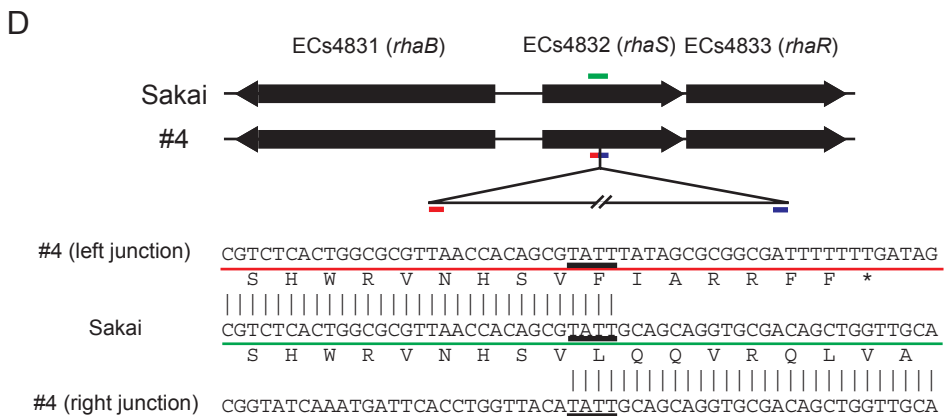

Supplement: pnas_99_26_17043__6.pdf [file pnas_99_26_17043__6.pdf]
